# Supplementary material for: Reutilization of Fe-containing tailings ore enriched by iron(iii) chloride as a heterogeneous Fenton catalyst for decolorization of organic dyes
Source: Royal Society of Chemistry journal article supplement (doi:10.1039/d1ra02939h), 2021-01-01
Supplement: d1ra02939h1.pdf [file d1ra02939h1.pdf]

**Supplementary material**

**Reutilization of Fe-containing tailings ore enriched by iron (III) chloride as  
heterogeneous Fenton catalyst for decolorization of organic dyes**

Lan Huong Nguyen<sup>1</sup>, Quoc Nguyen Ngo<sup>2</sup>, Huu Tap Van<sup>3\*</sup>, Van Nam Thai<sup>4</sup>, Tan Phong Nguyen<sup>1</sup>,  
Kieu Oanh Phan Thi<sup>5</sup>

<sup>1</sup>Faculty of Environment-Natural Resources and Climate Change, Ho Chi Minh City University  
of Food Industry (HUFi), Ho Chi Minh City, Vietnam

<sup>2</sup>Viet Nhat Industry Joint Stock Company, 140 Phan Anh Street, Tan Thoi Hoa Ward, Tan Phu  
District, Ho Chi Minh City

<sup>3</sup>Faculty of Natural Resources and Environment, TNU - University of Sciences (TNUS), Tan  
Thinh Ward, Thai Nguyen City, Vietnam

<sup>4</sup>HUTECH Institute of Applied Sciences, Ho Chi Minh City University of Technology  
(HUTECH), 475A Dien Bien Phu, Ward 25, Binh Thanh District, Ho Chi Minh City

<sup>5</sup>Institute for Tropicalization and Environment (ITE), 57A Truong Quoc Dung Street, Phu  
Nhuan District, Ho Chi Minh City, Vietnam

Corresponding author: Huu Tap Van (Email: [tapvh@tnus.edu.vn](mailto:tapvh@tnus.edu.vn))

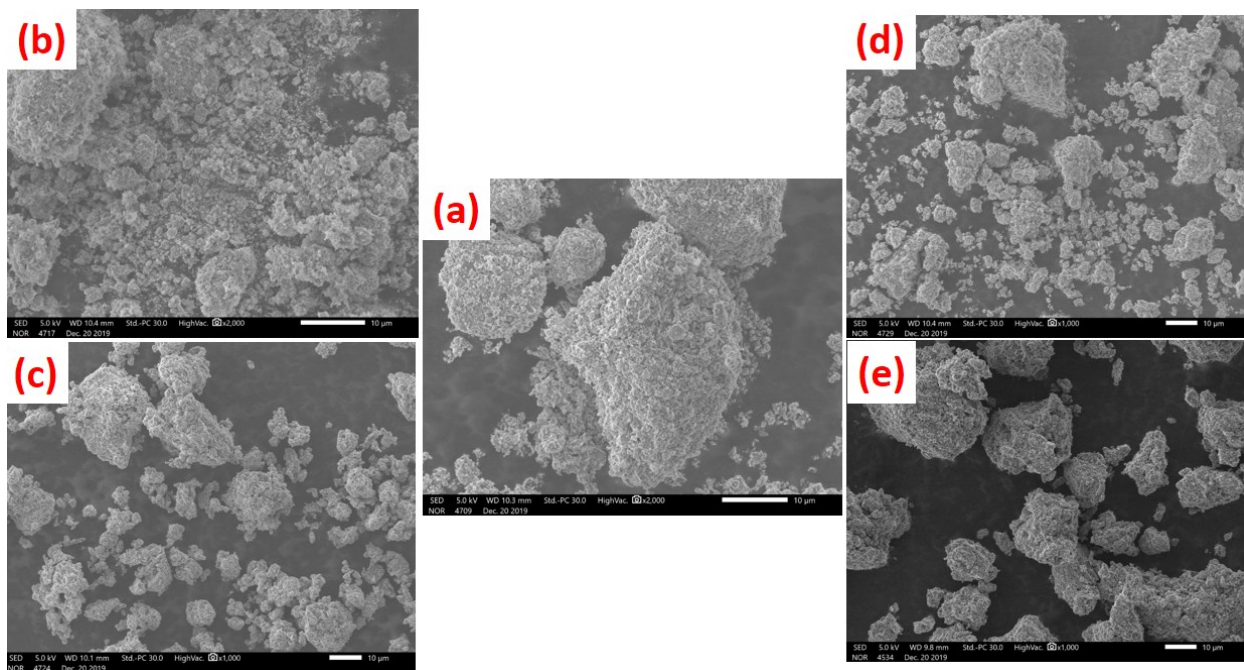

**Figure S1.** SEM images of (a) Fe-TO; (b) MFe-TO5; (c) MFe-TO10; (d) MFe-TO15; (e) MFe-TO20

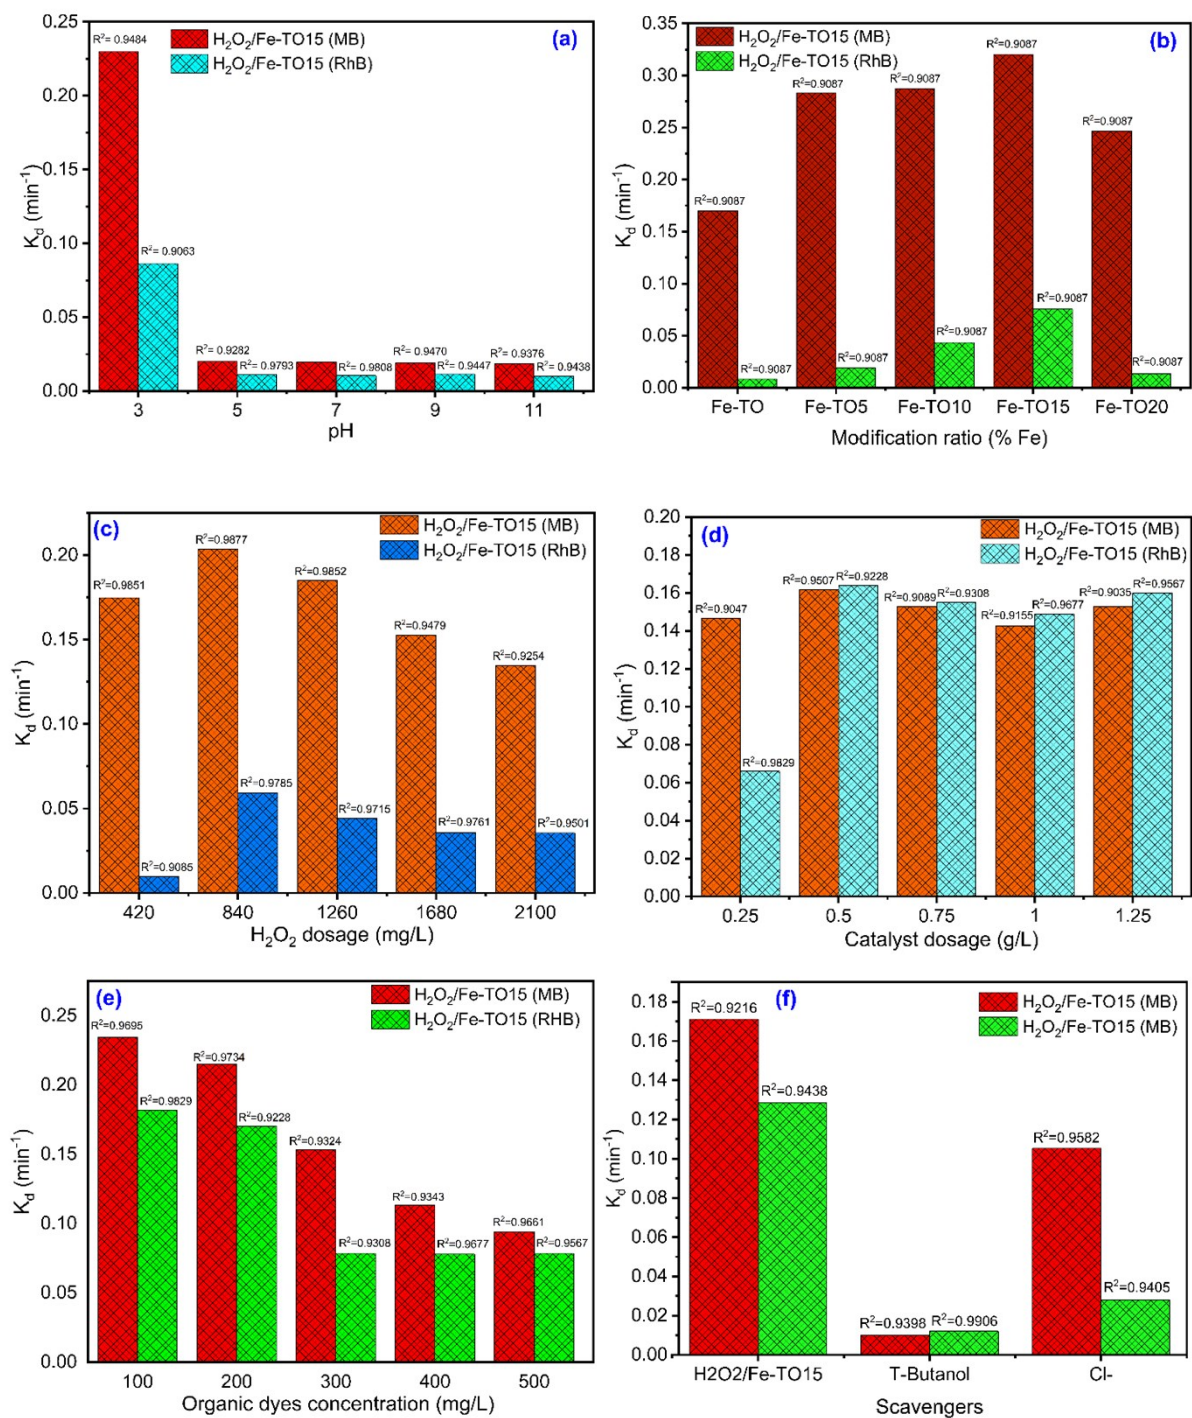

**Figure S2.**  $K_d$  values and  $R^2$  of MB and RhB decolorization by  $H_2O_2$ /MFe-TO15 with varying of (a) solution pH; (b) modification ratios; (c)  $H_2O_2$  dosages; (d) catalysts dosages; (e) initial organic dyes concentrations and (f) scavengers concentrations.

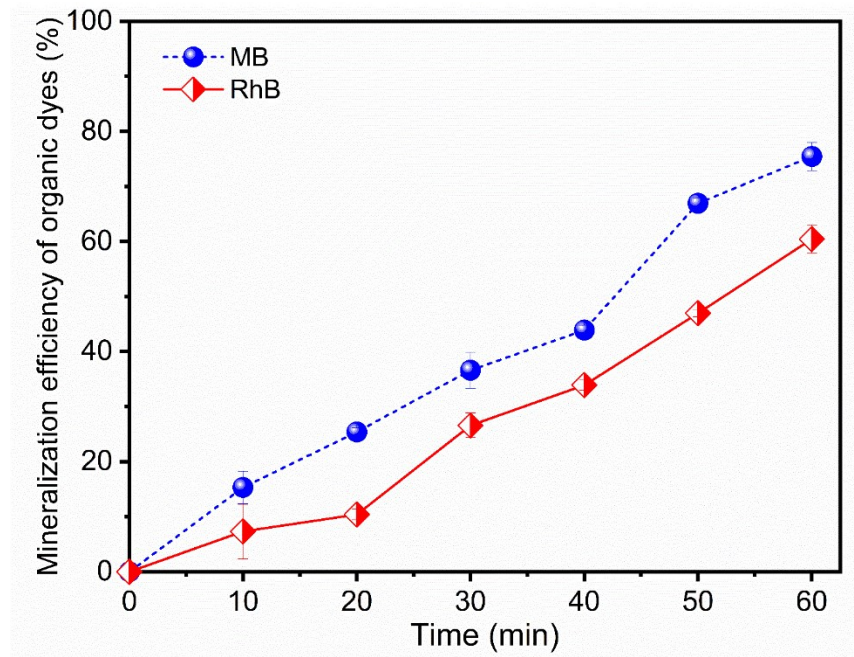

**Figure S3.** Mineralization of MB and RhB (in term of COD removal) by  $\text{H}_2\text{O}_2/\text{MFe-TO15}$  system at pH of 3, catalyst dosage of 0.5 g/L,  $\text{H}_2\text{O}_2$  dosage of 840 mg/L, initial organic dyes concentration of 200 mg/L.

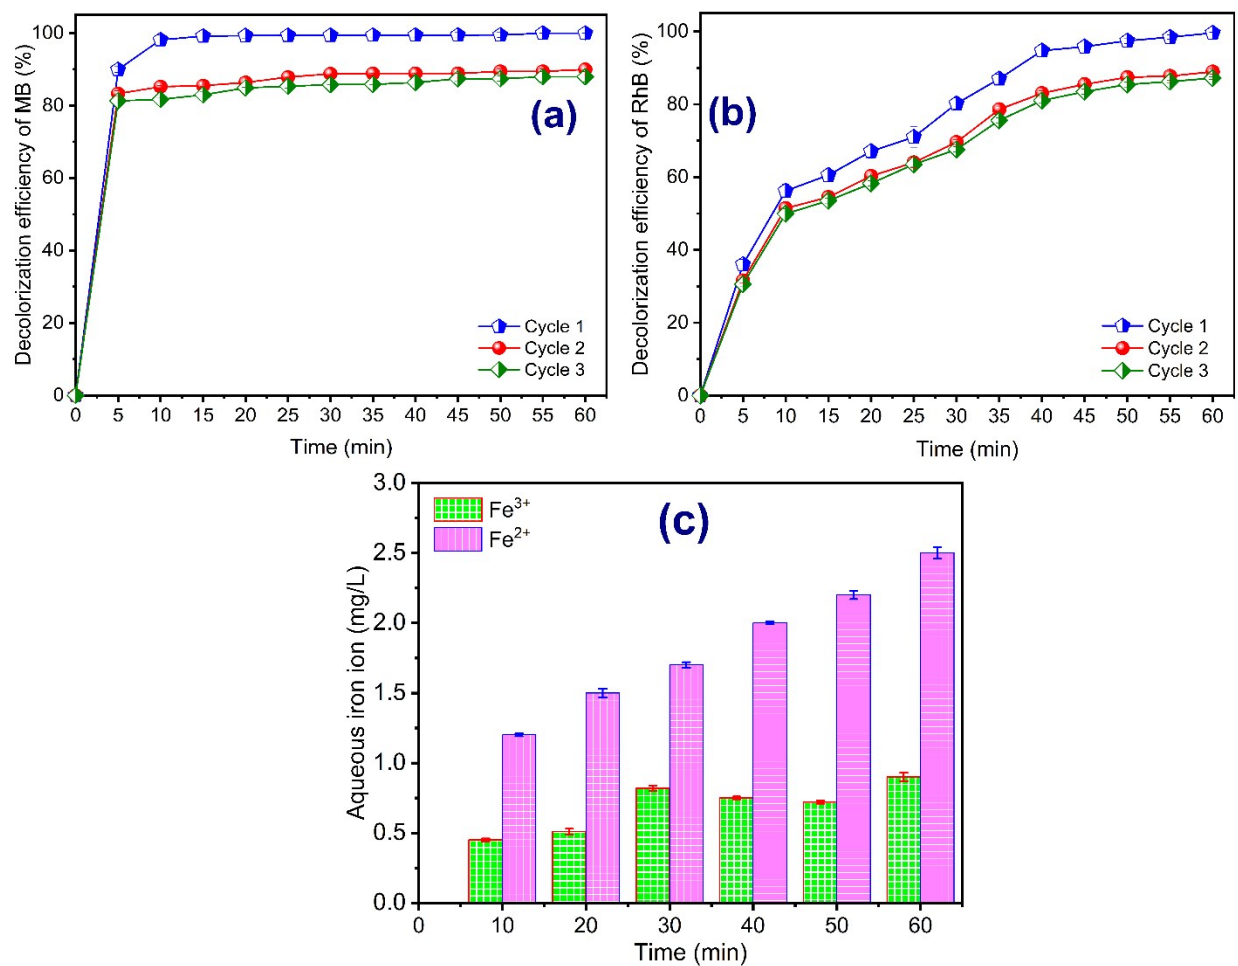

**Figure S4.** Reusability of catalyst (MFe-TO15) for decolorization of (a) MB; (b) RhB and stability of catalyst evaluated through leaching iron (c) at pH of 3, catalyst dosage of 0.5 g/L, H<sub>2</sub>O<sub>2</sub> dosage of 840 mg/L, initial organic dyes concentration of 200 mg/L by H<sub>2</sub>O<sub>2</sub>/MFe-TO15 system.
